# Supplementary material for: Hairpin embedded DNA lattices grown on a mica substrate
Source: Royal Society of Chemistry journal article supplement (doi:10.1039/c3ra44320e), 2013-01-01

## Electronic Supplementary Information

### Hairpin Embedded DNA Lattices Grown on a Mica Substrate<sup>†</sup>

Saima Bashar,<sup>a</sup> Chang-Won Lee,<sup>b</sup> Junwye Lee,<sup>a</sup> Byeonghoon Kim,<sup>a</sup> Bramaramba Gnapareddy,<sup>a</sup>  
Jihoon Shin,<sup>a</sup> Sreekantha Reddy Dugasani<sup>a</sup> and Sung Ha Park<sup>\*a</sup>

<sup>a</sup>*Sungkyunkwan Advanced Institute of Nanotechnology (SAINT) and Department of Physics,  
Sungkyunkwan University, Suwon 440-746, Korea*

<sup>b</sup>*Frontier Research Laboratory, Samsung Advanced Institute of Technology (SAIT), Yongin 446-712, Korea*

**Fig. S1.** Schematic diagrams of four possible hairpin positions on a DX tile.

**Fig. S2.** Schematic diagrams of DX tiles participating in DNA crystals.

**Fig. S3.** AFM images of DX crystals annealed in free solution.

**Fig. S4.** AFM images and a schematic of long hairpins (DX-1LH).

**Fig. S5.** AFM height analysis of substrate-assisted grown DX-1LH and DX-1DH.

**Table S1.** Sequencing pool for DX tiles.

**Table S2.** Individual tile names and their composition.

**Table S3.** Detailed tile combinations in five different crystals: DX-NH, DX-1SH, DX-2SH, DX-1DH, and DX-2DH.

**Table S4.** Unit conversion between monomer ( $C_m$ ) and molecular concentrations ( $C_{Mol}$ ).

**Fig. S1.** Schematic diagrams of four possible hairpin sites on a DX tile.

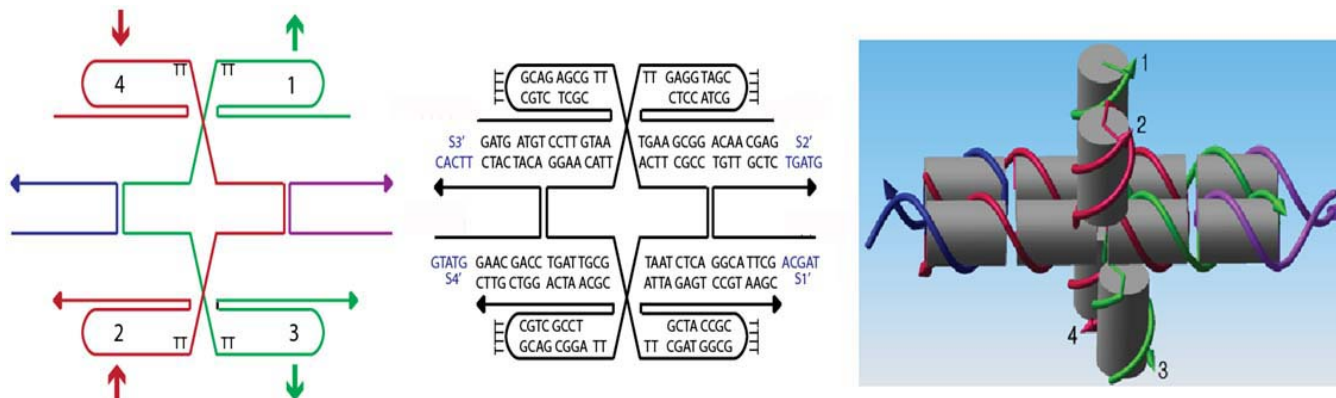

**Fig. S2.** Schematic diagrams of DX tiles participating in DNA crystals, (a) DX-NH, (b) DX-1SH, (c) DX-2SH, (d) DX-1DH and (e) DX-2DH. Complementary sticky end pairs are indicated by  $S_n$  and  $S_n'$  in sequence drawings (blue). Is in parentheses after the tile name indicates the existence of a hairpin in the designated positions shown in Fig. S1. For instance, CS4 (1,0,0,1) has hairpins at the 1 and 4 sites.

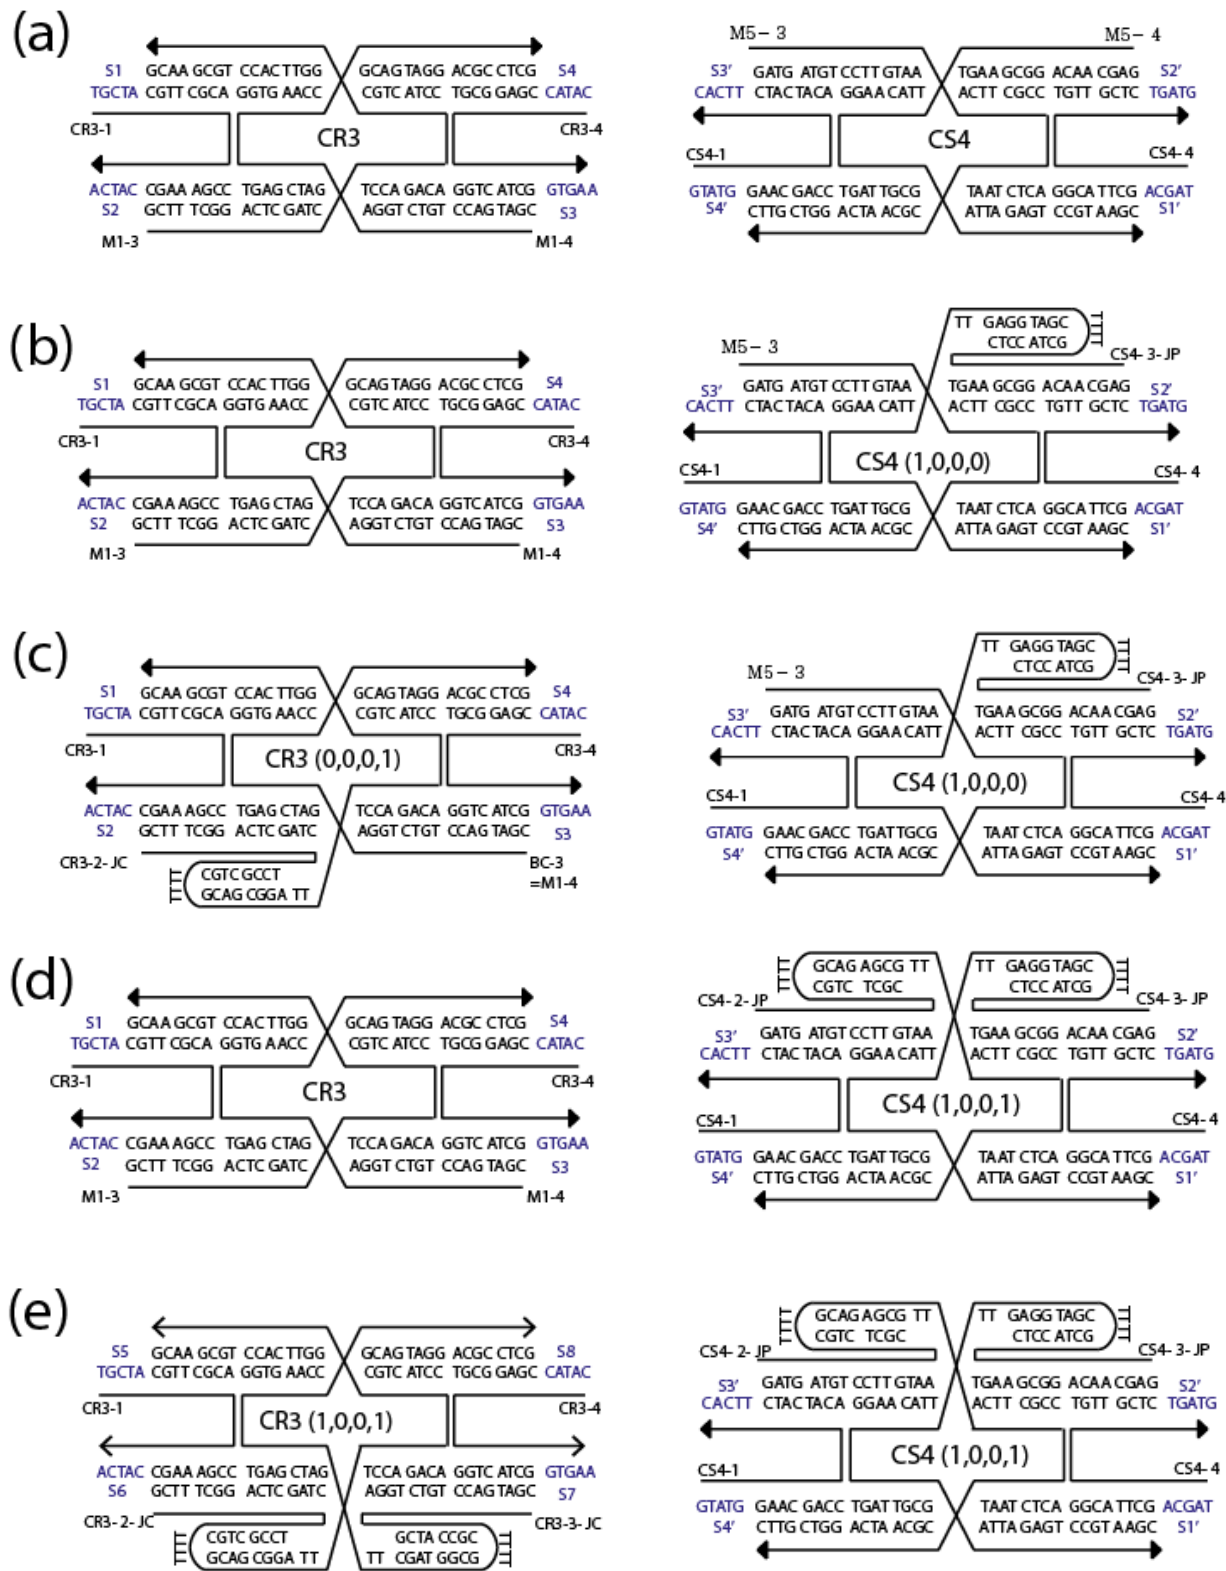

**Table S1.** Sequencing pool for DX tiles.

| Strand name | No. of Nucleotides | DNA Base Sequences (5' to 3')                                                           |
|-------------|--------------------|-----------------------------------------------------------------------------------------|
| CR3-1       | 26                 | TGCTA CGTT CGCA CCGA AAGC CATCA                                                         |
| CR3-2-JC    | 70                 | GCTT TCGG ACTC GATC TCCG CTGC TTTT GCAG CGGA TT TCCA GACA CCTA CTGC GGTT CACC TGCG AACG |
| CR3-3-JC    | 70                 | CGAT GACC TGTC TGGA GCTA CCGC TTTT GCGG TAGC TT GATC GAGT GGTG AACC GCAG TAGG ACGC CTCG |
| CR3-4       | 26                 | CATAC CGAG GCGT GGTC ATCG GTGAA                                                         |
| CS4-1       | 26                 | GTATG GAAC GACC ACAT CATC TTCAC                                                         |
| CS4-2-JP    | 70                 | GATG ATGT CCTT GTAA CGCT CTGC TTTT GCAG AGCG TT ACTT CGCC ACTC TAAT CGCA ATCA GGTC GTTC |
| CS4-3-JP    | 70                 | GAGC AACA GGCG AAGT CTCC ATCG TTTT CGAT GGAG TT TTAC AAGG TGAT TGCG ATTA GAGT CCGT AAGC |
| CS4-4       | 26                 | TAGCA GCTT ACGG TGTT GCTC TGATG                                                         |
| M1-3        | 48                 | GCTT TCGG ACTC GATC TCCA GACA CCTA CTGC GGTT CACC TGCG AACG                             |
| M1-4        | 48                 | CGAT GACC TGTC TGGA GATC GAGT GGTG AACC GCAG TAGG ACGC CTCG                             |
| M5-3        | 48                 | GATG ATGT CCTT GTAA ACTT CGCC ACTC TAAT CGCA ATCA GGTC GTTC                             |
| M5-4        | 48                 | GAGC AACA GGCG AAGT TTAC AAGG TGAT TGCG ATTA GAGT CCGT AAGC                             |

**Table S2.** Individual tile names and their composition.

|          | CR3   | CS4   | CR3 (1,0,0,1) | CR3(0,0,0,1) | CS4(1,0,0,0) | CS4(1,0,0,1) |
|----------|-------|-------|---------------|--------------|--------------|--------------|
| Strand 1 | CR3-1 | CS4-4 | CR3-1         | CR3-1        | CS4-4        | CS4-4        |
| Strand 2 | M1-3  | M5-4  | CR3-2-JC      | CR3-2-JC     | CS4-3-JP     | CS4-3-JP     |
| Strand 3 | M1-4  | M5-3  | CR3-3-JC      | M1-4         | M5-3         | CS4-2-JP     |
| Strand 4 | CR3-4 | CS4-1 | CR3-4         | CR3-4        | CS4-1        | CS4-1        |

**Table S3.** Detailed tile combinations in five different crystals: DX-NH, DX-1SH, DX-2SH, DX-1DH, and DX-2DH.

| DX-NH    | CR3   | CS4   |
|----------|-------|-------|
| Strand 1 | CR3-1 | CS4-4 |
| Strand 2 | M1-3  | M5-4  |
| Strand 3 | M1-4  | M5-3  |
| Strand 4 | CR3-4 | CS4-1 |

  

| DX-1SH   | CR3   | CS4(1,0,0,0) |
|----------|-------|--------------|
| Strand 1 | CR3-1 | CS4-4        |
| Strand 2 | M1-3  | CS4-3-JP     |
| Strand 3 | M1-4  | M5-3         |
| Strand 4 | CR3-4 | CS4-1        |

  

| DX-2SH   | CR3(0,0,0,1) | CS4(1,0,0,0) |
|----------|--------------|--------------|
| Strand 1 | CR3-1        | CS4-4        |
| Strand 2 | CR3-2-JC     | CS4-3-JP     |
| Strand 3 | M1-4         | M5-3         |
| Strand 4 | CR3-4        | CS4-1        |

  

| DX-1DH   | CR3   | CS4(1,0,0,1) |
|----------|-------|--------------|
| Strand 1 | CR3-1 | CS4-4        |
| Strand 2 | M1-3  | CS4-3-JP     |
| Strand 3 | M1-4  | CS4-2-JP     |
| Strand 4 | CR3-4 | CS4-1        |

  

| DX-2DH   | CR3(1,0,0,1) | CS4(1,0,0,1) |
|----------|--------------|--------------|
| Strand 1 | CR3-1        | CS4-1        |
| Strand 2 | CR3-2-JC     | CS4-2-JP     |
| Strand 3 | CR3-3-JC     | CS4-3-JP     |
| Strand 4 | CR3-4        | CS4-4        |

**Table S4.** Unit conversion between monomer ( $C_m$ ) and molecular concentrations ( $C_{Mol}$ ).

|             | Number of nucleotides (nt) | Molecular weight<br>( 325 Da. per nt) |
|-------------|----------------------------|---------------------------------------|
| Unit DX-NH  | 296                        | 96,200 Da.                            |
| Unit DX-2SH | 340                        | 110,500 Da.                           |
| Unit DX-2DH | 384                        | 124,800 Da.                           |

**Conversion equation:**

$$(\text{Molarity}) \times (\text{Avogadro number per mole}) \times (\text{Number of nts per unit tile}) \times (\text{Molecular weight per nt}) \times \left(\frac{1.66 \times 10^{-24} \text{ g}}{1 \text{ Da.}}\right) \times \left(\frac{1 \text{ liter}}{1000 \text{ cm}^3}\right)$$

$$\text{Ex.) } 1 \text{ nM of DX-NH} = \frac{1 \text{ nmole}}{1 \text{ liter}} \times \frac{6.02 \times 10^{23}}{1 \text{ mole}} \times 296 \text{ nts} \times \frac{325 \text{ Da.}}{1 \text{ nt}} \times \frac{1.66 \times 10^{-24} \text{ g}}{1 \text{ Da.}} \times \frac{1 \text{ liter}}{1000 \text{ cm}^3}$$

$$= 0.962 \times 10^{-7} \text{ g/cm}^3$$

**Molecular concentration ( $C_{Mol}$ ) of each DNA crystal (units:  $10^{-7} \text{ g/cm}^3$ ).**

|        | 1 nM  | 5 nM  | 10 nM  | 20 nM  |
|--------|-------|-------|--------|--------|
| DX-NH  | 0.962 | 4.806 | 9.62   | 19.24  |
| DX-2SH | 1.104 | 5.521 | 11.042 | 22.084 |
| DX-2DH | 1.247 | 6.235 | 12.471 | 24.943 |

**Fig. S3.** AFM images of DX crystals (DX-NH, DX-1SH, DX-2SH, DX-1DH and DX-2DH) with  $C_m = 200 \text{ nM}$  annealed in free solution. Scan sizes are  $1 \times 1 \mu\text{m}^2$ .

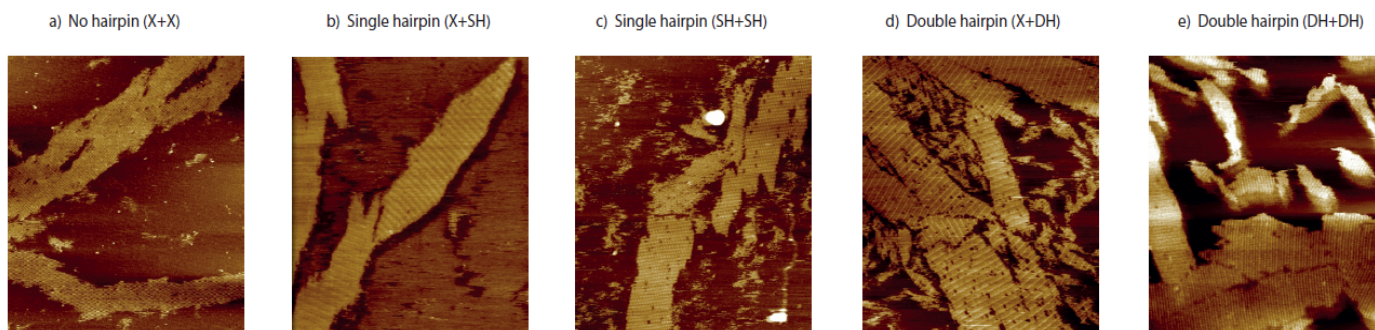

**Fig. S4.** AFM images and a schematic of a long hairpin lattice (DX-1LH). DX-1LH has hairpins twice longer than a hairpin used in **Fig. 1.** and **Fig. S2.** The lattice is self-assembled into extended 2D crystalline arrays with highly ordered structures on a mica substrate. (a) An AFM image of substrate-assisted grown hairpin-embedded DX-1LH lattices (Scan size,  $1 \times 1 \mu\text{m}^2$ ). (b) An AFM image of DX-1LH annealed in free solution (Scan size,  $1 \times 1 \mu\text{m}^2$ ). (c) Base sequences of DX-1LH motifs, one has no hairpin while the other has double hairpins positioned in upward and downward directions.

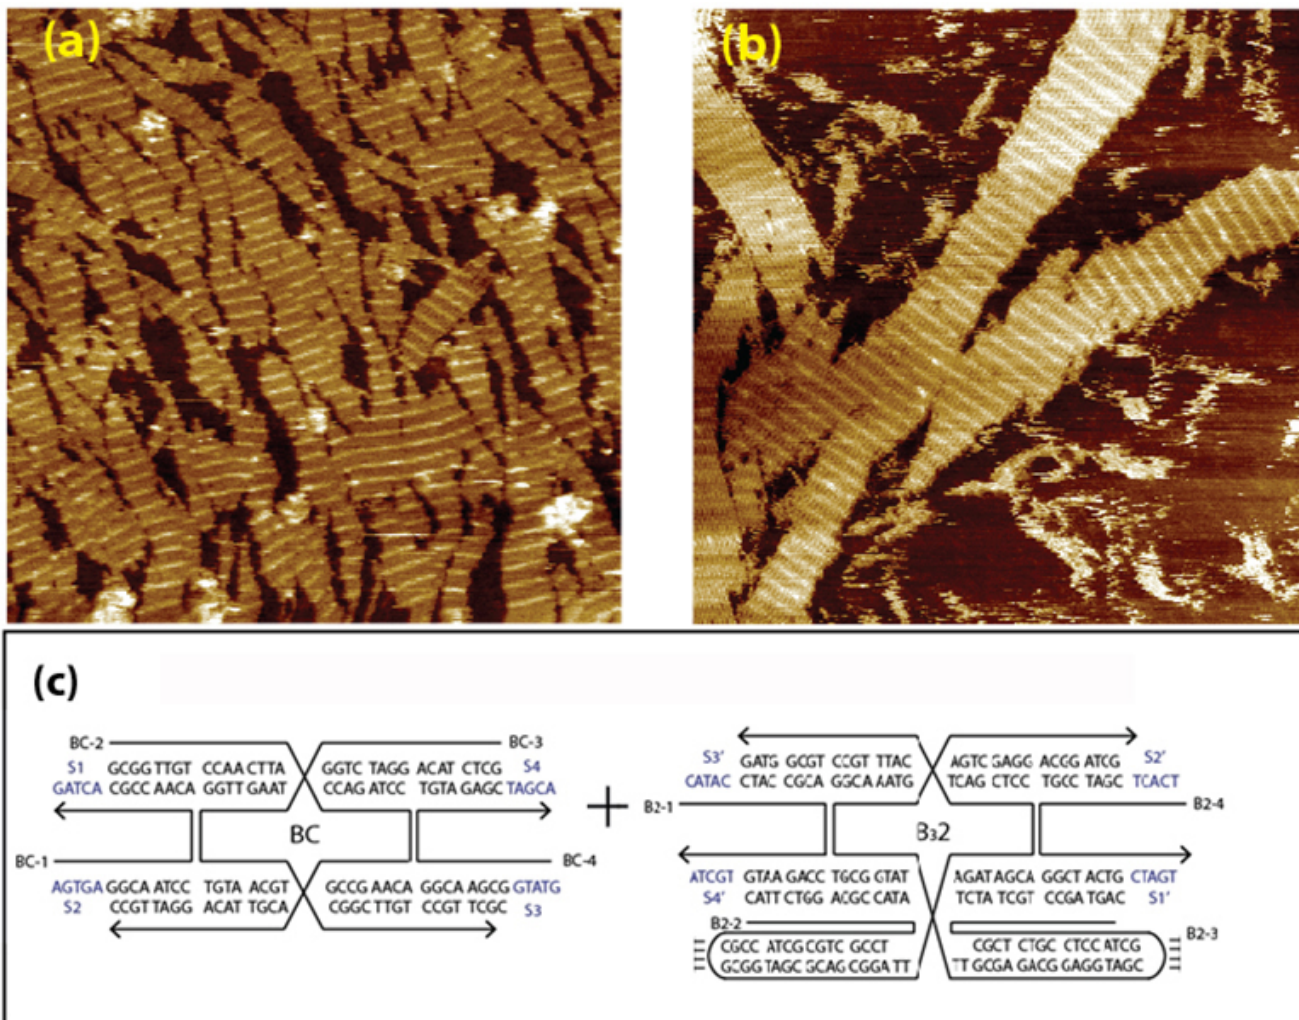

**Fig. S5.** AFM height analysis of substrate-assisted grown DX-1LH and DX-1DH. Average heights of DX-1LH and DX-1DH measured from the bare DX lattices are 1.1 nm and 0.5 nm respectively shown in (a) and (b). In addition, average heights of DX-1LH and DX-1DH measured from the surface of the substrate are 2.5 nm and 2.0 nm respectively. The height differences between measured and theoretical values are due to AFM tip pressure during collecting data and suppression by electrostatic interactions between DNA molecules and the given substrate. Although we have certain limitations to measure heights of hairpins precisely, we can observe the height differences of different length of hairpins like DX-1LH and DX-1DH easily.

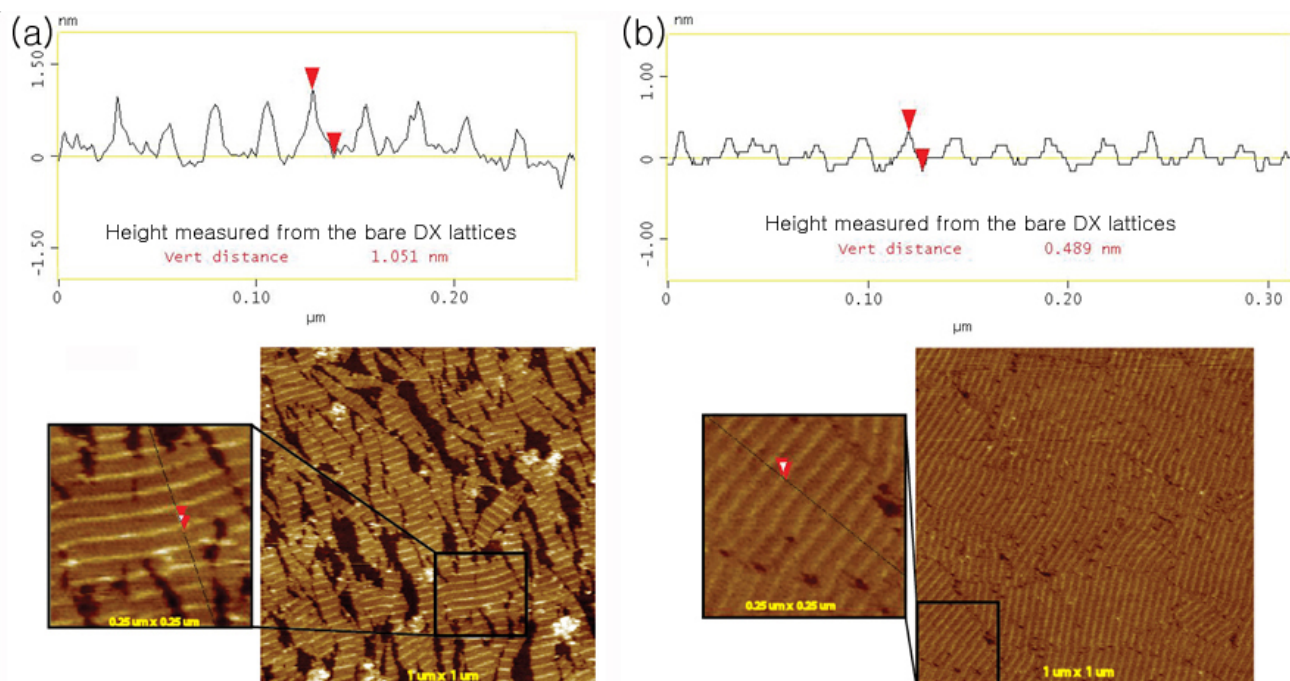

Supplement: c3ra44320e.pdf [file c3ra44320e.pdf]
